# Supplementary material
Source: MDPI journal article supplement (https://www.mdpi.com/2413-8851/6/3/61)
Supplement: s1 [file s1]

**Supplemental Table S1.** Vegetation and management characteristics of the different habitats at each university campus.

| Campus                 | Natural                                                                                                                                                                                                                                                                | Lawn                                                                                  | Shrub                                                                                                                                                         | Waterwise                                                                                                                                                                                                 | Waterwise + mulch                                                                                                                                                                                          |
|------------------------|------------------------------------------------------------------------------------------------------------------------------------------------------------------------------------------------------------------------------------------------------------------------|---------------------------------------------------------------------------------------|---------------------------------------------------------------------------------------------------------------------------------------------------------------|-----------------------------------------------------------------------------------------------------------------------------------------------------------------------------------------------------------|------------------------------------------------------------------------------------------------------------------------------------------------------------------------------------------------------------|
| Pomona College         | <i>Artemisia californica</i> , <i>Eriogonum fasciculatum</i> var. <i>foliolosum</i> , <i>Malosma laurina</i> . No additional irrigation.                                                                                                                               | Kikuyu, Bermuda, Rye grass. Irrigation 3x/week in summer, 2x/week in winter.          | <i>Myrsine africana</i> (African boxwood). No Mulch. Drip irrigation 2x/week (60 min).                                                                        | <i>Baccharis pilularis</i> (coyote bush), small oaks ( <i>Quercus agrifolia</i> ), wild roses. Drip irrigation 2x/week (60 min).                                                                          | <i>Senecio</i> sp., <i>Stipa</i> sp., <i>Phlomis fruticose</i> . Drip irrigation 2x/week (60 min).                                                                                                         |
| Whitter College        | <i>Acacia cyclops</i> , iceplants ( <i>Carpobrotus</i> sp.), Lantana. No irrigation or other inputs.                                                                                                                                                                   | Kikuyu grass turf. Irrigated daily.                                                   | Deer grass ( <i>Muhlenbergia rigens</i> ), <i>Ceanothus</i> sp., Coast live oak ( <i>Quercus agrifolia</i> ). No mulch. Irrigated 3x/week                     | <i>Ceanothus</i> sp., sage sp., Toyon ( <i>Heteromeles arbutifolia</i> ) No mulch. Irrigated 2x/week                                                                                                      | Lavender cotton ( <i>Santolina</i> sp.), <i>Ceanothus</i> sp., <i>Juncus</i> sp., Agave americana, Western redbud. Mulch. Irrigated 2x/week                                                                |
| CSU Fullerton          | <i>Quercus suber</i> , <i>Ceratonia siliqua</i> , misc. Chilean plants. Litter from trees. No irrigation or other inputs.                                                                                                                                              | Kikuyu, Bermuda, Rye grass. Overhead irrigation 3x/week in summer, 2x/week in winter. | <i>Buxus microphylla</i> var. <i>japonica</i> (hedge), <i>Calodendrum capense</i> , <i>Wisteria floribunda</i> (on arbor). No mulch. Drip irrigation 2x/week. | Misc. drought tolerant species – <i>Melilotus albus</i> , <i>Nemophila menziesii</i> , Festuca. No mulch. Overhead irrigation as needed.                                                                  | Misc. CA natives – <i>Muhlenbergia rigens</i> , <i>Salvia</i> ‘Aromas’, <i>Eriogonum fasciculatum</i> , <i>Verbena lilacina</i> ‘De La Mina’, <i>Salvia</i> ‘Skylark’. Mulch. Overhead irrigation 1x/week. |
| Occidental College     | Oak species and grasses/weeds dominant. No irrigation.                                                                                                                                                                                                                 | Grass turf. Irrigation schedule unknown.                                              | Shrub and tree species. Irrigation schedule unknown.                                                                                                          | Agave and cacti species. No mulch. Irrigation schedule unknown.                                                                                                                                           | Pollinator-friendly and native plants. Small tree. Mulch. Irrigation schedule unknown.                                                                                                                     |
| University of Redlands | <i>Bromus</i> sp., mustards <i>Brassica</i> sp., rockets <i>Eruca</i> sp., cheeseweed <i>Malva parviflora</i>                                                                                                                                                          | Bermuda/Rye grass mix. Irrigated with pop-up sprinklers Mon/We/Fri/Sat                | Pyracantha Irrigated with pop-up sprinklers Tue/Thurs/Sat                                                                                                     | Orange grove; no mulch Irrigated with drip irrigation every other day                                                                                                                                     | Orange grove; mulch Irrigated with drip irrigation every other day                                                                                                                                         |
| CSU San Marcos         | Chaparral dominated by chamise ( <i>Adenostoma fasciculatum</i> ) and black sage ( <i>Salvia mellifera</i> ). No irrigation or other inputs.                                                                                                                           | Kikuyu grass, watered 4x/week and fertilized 4x/year.                                 | Bougainvillea Scarlet O’Hara without mulching. Watered 2x/week and fertilized 2x/year                                                                         | Variegated Century plant ( <i>Agave americana</i> ), Coyote Brush ( <i>Baccharis pilularis</i> ), Bougainvillea Raspberry ice without mulch. Irrigation 2x/week and fertilization 2x/year.                | Variegated Century plant ( <i>Agave americana</i> ), purple trailing lantana ( <i>Lantana montevidensis</i> ), Bougainvillea Raspberry ice. Bark mulch. Irrigation 2x/week and fertilization 2x/year.      |
| CSU Los Angeles        | Coast Live Oak ( <i>Quercus agrifolia</i> ), Laurel Sumac ( <i>Malosma laurina</i> ) and Toyon ( <i>Heteromeles arbutifolia</i> ), Tree Tobacco ( <i>Nicotiana glauca</i> ), California Sycamore ( <i>Platanus racemosa</i> ), non-native annual grasses. Not watered. | Turf grass with <i>Washingtonia</i> spp. palm trees.                                  | Crepe Myrtle ( <i>Lagerstroemia</i> spp.), American Sweetgum ( <i>Liquidambar styraciflua</i> ), <i>Pittosporum</i> spp., various evergreen exotic shrubs     | Blue Palo Verde ( <i>Parkinsonia florida</i> ), golden barrel cactus ( <i>Echinocactus grusonii</i> ), Bird of Paradise ( <i>Strelitzia nicolai</i> ), Blue Agave ( <i>Agave tequilana</i> ), bunch grass | <i>Washingtonia</i> spp., Date palm trees ( <i>Phoenix</i> spp.), Bird of Paradise, Lily ( <i>Lilium</i> spp.), bunch grass. Mulch.                                                                        |

**Supplemental Table S2.** Mean percent data retrieval, mass remaining, and N mass remaining for each site and the coefficient of variation (CV = Standard deviation/Mean \* 100) for the mass and N remaining within each habitat type for oak and sycamore litter.

| Site                   | Habitat               | Data retrieval<br>(%) | Oak                   |                    | Sycamore              |                    |
|------------------------|-----------------------|-----------------------|-----------------------|--------------------|-----------------------|--------------------|
|                        |                       |                       | Mass remaining<br>(%) | N remaining<br>(%) | Mass remaining<br>(%) | N remaining<br>(%) |
| Pomona College         | Lawn                  | 100                   | 47.4                  | 39.4               | 67.9                  | 50.9               |
| Whittier College       |                       | 100                   | 42.3                  | 53.3               | 46.7                  | 40.6               |
| CSU Fullerton          |                       | 38                    | 58.9                  | 71.9               | 68.5                  | 71.8               |
| Occidental College     |                       | 0                     | —                     | —                  | —                     | —                  |
| University of Redlands |                       | 38                    | 37.6                  | 30.0               | 70.6                  | 84.0               |
| CSU San Marcos         |                       | 88                    | 70.5                  | 59.0               | 78.1                  | 52.0               |
| CSU Los Angeles        |                       | 0                     | —                     | —                  | —                     | —                  |
|                        | <b>Mean</b>           | <b>54</b>             | <b>51.3</b>           | <b>50.7</b>        | <b>66.2</b>           | <b>64.0</b>        |
|                        | <b>CV (%)</b>         |                       | <b>26.0</b>           | <b>32.4</b>        | <b>15.8</b>           | <b>29.1</b>        |
| Pomona College         | Natural               | 100                   | 67.9                  | 81.4               | 77.9                  | 72.0               |
| Whittier College       |                       | 100                   | 57.1                  | 68.0               | 66.5                  | 76.4               |
| CSU Fullerton          |                       | 88                    | 62.0                  | 77.3               | 75.1                  | 81.8               |
| Occidental College     |                       | 100                   | 72.2                  | 76.6               | 77.1                  | 84.4               |
| University of Redlands |                       | 88                    | 68.8                  | 102.4              | 72.1                  | 71.4               |
| CSU San Marcos         |                       | 100                   | 78.4                  | 62.0               | 79.4                  | 53.9               |
| CSU Los Angeles        |                       | 88                    | 64.4                  | 97.2               | 78.4                  | 105.3              |
|                        | <b>Mean</b>           | <b>95</b>             | <b>67.2</b>           | <b>80.7</b>        | <b>75.2</b>           | <b>77.9</b>        |
|                        | <b>CV (%)</b>         |                       | <b>10.4</b>           | <b>18.1</b>        | <b>6.0</b>            | <b>20.0</b>        |
| Pomona College         | Shrub                 | 88                    | 56.3                  | 53.6               | 68.2                  | 53.3               |
| Whittier College       |                       | 100                   | 46.4                  | 58.7               | 58.4                  | 60.2               |
| CSU Fullerton          |                       | 88                    | 60.4                  | 75.5               | 62.2                  | 67.2               |
| Occidental College     |                       | 88                    | 63.8                  | 66.9               | 74.7                  | 71.0               |
| University of Redlands |                       | 88                    | 58.4                  | 102.5              | 59.6                  | 60.2               |
| CSU San Marcos         |                       | 100                   | 76.9                  | 65.0               | 83.5                  | 64.0               |
| CSU Los Angeles        |                       | 100                   | 65.7                  | 90.9               | 70.9                  | 80.1               |
|                        | <b>Mean</b>           | <b>93</b>             | <b>61.1</b>           | <b>73.3</b>        | <b>68.2</b>           | <b>65.1</b>        |
|                        | <b>CV (%)</b>         |                       | <b>15.3</b>           | <b>24.2</b>        | <b>13.2</b>           | <b>13.3</b>        |
| Pomona College         | Water wise            | 88                    | 59.9                  | 66.7               | 69.5                  | 51.5               |
| Whittier College       |                       | 100                   | 46.9                  | 55.5               | 53.3                  | 49.1               |
| CSU Fullerton          |                       | 75                    | 50.4                  | 62.9               | 68.3                  | 64.3               |
| Occidental College     |                       | 50                    | 64.4                  | 76.2               | 73.1                  | 73.7               |
| University of Redlands |                       | 100                   | 63.7                  | 141.6              | 70.4                  | 58.7               |
| CSU San Marcos         |                       | 100                   | 67.6                  | 30.6               | 66.1                  | 31.8               |
| CSU Los Angeles        |                       | 0                     | 62.0                  | 95.1               |                       |                    |
|                        | <b>Mean</b>           | <b>73</b>             | <b>59.3</b>           | <b>75.5</b>        | <b>66.8</b>           | <b>54.9</b>        |
|                        | <b>CV (%)</b>         |                       | <b>13.0</b>           | <b>46.6</b>        | <b>10.5</b>           | <b>26.3</b>        |
| Pomona College         | Water wise +<br>Mulch | 100                   | 56.0                  | 62.9               | 57.8                  | 57.6               |
| Whittier College       |                       | 100                   | 59.2                  | 67.5               | 61.2                  | 58.2               |
| CSU Fullerton          |                       | 88                    | 53.9                  | 55.9               | 67.5                  | 51.5               |
| Occidental College     |                       | 0                     | —                     | —                  | —                     | —                  |
| University of Redlands |                       | 100                   | 41.5                  | 55.2               | 61.6                  | 73.4               |
| CSU San Marcos         |                       | 100                   | 63.2                  | 27.5               | 69.7                  | 35.6               |
| CSU Los Angeles        |                       | 50                    | 51.8                  | 87.3               | 74.3                  | 96.9               |
|                        | <b>Mean</b>           | <b>77</b>             | <b>54.3</b>           | <b>59.4</b>        | <b>65.3</b>           | <b>62.2</b>        |
|                        | <b>CV (%)</b>         |                       | <b>13.6</b>           | <b>32.9</b>        | <b>9.5</b>            | <b>33.7</b>        |
